# Supplementary material for: Nationwide mammography screening participation in Denmark during the COVID-19 pandemic: An observational study
Source: eLife. 2023 Aug 17;12:e83541. doi: 10.7554/eLife.83541 (PMC10513477; doi:10.7554/eLife.83541)
Supplement: Supplementary file 1. [file elife-83541-supp1.xlsx]

## Sheet: Sheet1
Supplementary 1. Proportion of women participating in mammography screening in Denmark within 90 days since invitation from 2016 to 2021*
	Pre-pandemic (01Jan2016-31Jan2020)	Pre-lockdown (01Feb2020-10Mar2020)	Difference	1st lockdown (11Mar2020-15Apr2020)	Difference	1st re-opening (16Apr2020-15Dec2020)	Difference	2nd lockdown (16Dec2020-27Feb2021)	Difference	2nd re-opening (28Feb2021-30Sep2021)	Difference
	%	%	%	%	%	%	%	%	%	%	%
Total	80.2248	69.9019	-10.3229	76.4822	-3.74255	79.8227	-0.402054	81.0085	0.783752	79.9022	-0.322586
Age at invitation
50-54 years	77.6294	68.1144	-9.51498	75.4877	-2.14168	78.4531	0.823647	79.1936	1.56419	77.9572	0.327797
55-59 years	80.26	70.7808	-9.47922	77.3038	-2.95626	80.059	-0.201004	81.7353	1.47527	79.7591	-0.500923
60-64 years	81.5285	70.8717	-10.6568	76.7103	-4.81819	80.555	-0.97348	81.881	0.352501	80.7286	-0.799919
65-69 years	82.5606	70.3392	-12.2214	76.5807	-5.97988	80.9528	-1.60777	81.9764	-0.584213	81.7334	-0.827164
Ethnicity
Danish descent	81.3781	71.4674	-9.91068	77.9486	-3.42942	81.1993	-0.17878	82.6529	1.2748	81.5199	0.141884
Descendant of immigrant	72.4808	65.3846	-7.09618	61.5385	-10.9423	71.5084	-0.97242	85.7143	13.2335	74.2616	1.78081
Western immigrant	67.7829	55.0864	-12.6965	63.8158	-3.96712	65.7393	-2.0436	68.1059	0.322937	68.0787	0.295799
Non-western immigrant	66.8214	53.1998	-13.6216	61.4744	-5.34699	66.6242	-0.197235	70.3905	3.5691	66.3761	-0.445305
Cohabitation status
Living alone	72.1239	61.688	-10.4359	67.6954	-4.4285	71.1459	-0.977997	67.9086	-4.21532	N/A	N/A
Cohabiting	78.8744	69.2855	-9.58892	75.9416	-2.93284	78.7469	-0.12751	78.4722	-0.402199	N/A	N/A
Married	84.5454	74.4717	-10.0737	81.3258	-3.21955	84.4587	-0.0866241	82.1719	-2.37349	N/A	N/A
Educational level (ISCED)
ISCED15 level 1-2	79.8224	69.8337	-9.98876	76.1623	-3.66013	79.6186	-0.20385	81.0451	1.22262	79.8336	0.0111313
ISCED15 level 3-4	81.7726	71.3337	-10.4389	77.8176	-3.95502	81.1659	-0.606781	81.9616	0.18895	80.9651	-0.807556
ISCED15 level 5-8	80.182	68.6545	-11.5276	76.8892	-3.29286	80.0439	-0.138084	80.9049	0.722839	80.6476	0.465584
Disposable income
Lowest quintile	73.7747	60.0539	-13.7208	66.7298	-7.04493	70.5653	-3.20941	71.7571	-2.01761	71.2754	-2.49924
Second quintile	76.7583	64.681	-12.0773	70.6093	-6.14897	73.4695	-3.2888	74.2727	-2.48557	73.9858	-2.77248
Third quintile	81.8832	71.6422	-10.241	77.2942	-4.58902	81.4118	-0.471405	82.139	0.255859	80.468	-1.41518
Fourth quintile	84.4308	75.5403	-8.89056	83.0282	-1.40266	85.1238	0.693001	85.772	1.34119	84.5128	0.081955
Highest quintile	84.5036	75.9526	-8.551	83.3978	-1.10583	86.001	1.49738	86.7822	2.27861	85.7304	1.22673
Healthcare usage
Rare	75.3915	66.1388	-9.25271	72.2801	-3.11142	75.1725	-0.21904	76.4688	1.07728	74.8196	-0.571907
Low	81.1564	71.6843	-9.47214	77.962	-3.19444	81.1584	0.00196838	82.1627	1.00629	80.3961	-0.760292
Average	82.1407	71.3969	-10.7438	78.8277	-3.31303	81.9331	-0.207573	82.663	0.522308	82.1457	0.00495911
High	82.2984	72.3929	-9.90553	77.2373	-5.06116	81.89	-0.40847	83.155	0.856552	82.3826	0.0841751
Frequent	80.8293	68.566	-12.2633	76.4409	-4.38835	79.6077	-1.22162	81.0309	0.201637	80.2277	-0.601616
* The difference in participation between each pandemic phase compared to the pre-pandemic phase
