# Supplementary material for: Nationwide mammography screening participation in Denmark during the COVID-19 pandemic: An observational study
Source: eLife. 2023 Aug 17;12:e83541. doi: 10.7554/eLife.83541 (PMC10513477; doi:10.7554/eLife.83541)
Supplement: Supplementary file 2. [file elife-83541-supp2.xlsx]

## Sheet: Sheet1
Supplementary File 2. Proportion of women participating in mammography screening in Denmark within 180 days since invitation from 2016 to 2021*
	Pre-pandemic (01Jan2016-31Jan2020)	Pre-lockdown (01Feb2020-10Mar2020)	Difference	1st lockdown (11Mar2020-15Apr2020)	Difference	1st re-opening (16Apr2020-15Dec2020)	Difference	2nd lockdown (16Dec2020-27Feb2021)	Difference	2nd re-opening (28Feb2021-30Jun2021)	Difference
	%	%	%	%	%	%	%	%	%	%	%
Total	82.7317	78.0242	-4.70753	80.6919	-2.03975	82.5641	-0.16758	83.7105	0.978844	83.4544	0.72271
Age at invitation
50-54 years	80.4112	76.3602	-4.051	78.8644	-1.54679	81.0358	0.62458	81.5835	1.17224	81.7578	1.34656
55-59 years	82.9986	78.4829	-4.51573	81.5415	-1.45709	83.1309	0.132278	84.6252	1.62656	83.7006	0.702003
60-64 years	84.0368	78.8344	-5.20239	80.934	-3.10278	83.493	-0.543793	84.7521	0.715355	84.4603	0.423553
65-69 years	84.4129	78.9989	-5.414	81.768	-2.64494	83.3374	-1.0755	84.755	0.34211	84.408	-0.00488281
Ethnicity
Danish descent	83.8815	79.4443	-4.43723	82.0857	-1.79578	83.9517	0.0701675	85.4403	1.55882	85.0211	1.13966
Descendant of immigrant	75.8247	78.8462	3.02148	80.7692	4.94456	74.3017	-1.52299	87.1429	11.3182	79.7546	3.92993
Western immigrant	70.2374	63.4357	-6.80167	67.7632	-2.47421	68.6244	-1.61295	71.727	1.48965	73.021	2.78364
Non-western immigrant	69.3925	63.361	-6.03149	66.4685	-2.92402	69.1407	-0.251793	73.1754	3.78291	71.0215	1.62901
Cohabitation status
Living alone	74.7029	69.7787	-4.92423	72.6243	-2.07859	74.1142	-0.588776	72.735	-1.96796	N/A	N/A
Cohabiting	81.329	76.2526	-5.07645	79.7079	-1.62113	81.3197	-0.0093689	82.6389	1.30984	N/A	N/A
Married	87.0238	82.8034	-4.2204	85.2168	-1.80704	87.1124	0.0886307	86.2548	-0.769005	N/A	N/A
Educational level (ISCED)
ISCED15 level 1-2	82.2611	77.861	-4.40015	80.0426	-2.21853	82.3175	0.0564041	83.6496	1.38849	83.1987	0.937584
ISCED15 level 3-4	84.2313	79.2159	-5.01534	82.1209	-2.11037	83.9131	-0.318161	84.683	0.451736	84.6169	0.385658
ISCED15 level 5-8	83.1463	78.0256	-5.1207	82.8086	-0.337692	82.918	-0.228218	84.0897	0.943413	84.7114	1.56517
Disposable income
Lowest quintile	75.7701	67.8084	-7.96172	71.0825	-4.68764	72.9423	-2.82783	74.3809	-1.38925	74.1517	-1.61843
Second quintile	78.9497	71.9521	-6.99757	74.6953	-4.25434	76.0339	-2.91581	76.9182	-2.0315	77.0105	-1.9392
Third quintile	84.396	79.43	-4.966	81.6467	-2.74931	84.2124	-0.183662	84.5365	0.140518	83.7493	-0.646698
Fourth quintile	87.2793	83.469	-3.81029	86.831	-0.448288	88.0675	0.788193	88.6237	1.34444	88.1125	0.833206
Highest quintile	87.5087	85.6205	-1.88824	87.8465	0.337822	88.9297	1.42093	89.6655	2.15672	89.907	2.39828
Healthcare usage
Rare	77.8768	73.4862	-4.39066	75.9283	-1.94851	77.7004	-0.176476	78.8444	0.967575	78.3664	0.489578
Low	83.6432	79.6094	-4.0338	81.8844	-1.75888	83.7582	0.114975	84.8308	1.18754	83.9448	0.301552
Average	84.5982	79.8357	-4.76253	83.0237	-1.57449	84.6918	0.0936432	85.4059	0.807693	85.8552	1.257
High	84.8496	80.2482	-4.60135	81.6561	-3.19343	84.7371	-0.112495	85.7131	0.863518	85.8739	1.02435
Frequent	83.3925	77.6596	-5.7329	81.3401	-2.05242	82.6041	-0.788361	84.2017	0.809242	83.6875	0.295021
* The difference in participation between each pandemic phase compared to the pre-pandemic phase
