# Supplementary material for: Nationwide mammography screening participation in Denmark during the COVID-19 pandemic: An observational study
Source: eLife. 2023 Aug 17;12:e83541. doi: 10.7554/eLife.83541 (PMC10513477; doi:10.7554/eLife.83541)
Supplement: Supplementary file 3. [file elife-83541-supp3.xlsx]

## Sheet: Sheet1
Supplementary File 3. Proportion of women participating in mammography screening in Denmark within 365 days since invitation from 2016 to 2021*
	Pre-pandemic (01Jan2016-31Jan2020)	Pre-lockdown (01Feb2020-10Mar2020)	Difference	1st lockdown (11Mar2020-15Apr2020)	Difference	1st re-opening (16Apr2020-15Dec2020)	Difference	2nd lockdown (16Dec2020-31Dec2020)	Difference
	%	%	%	%	%	%	%	%	%
Total	83.1448	79.5679	-3.57697	81.4773	-1.66756	83.1593	0.014473	82.6826	-0.462196
Age at invitation
50-54 years	80.9373	77.758	-3.17931	79.7149	-1.22243	81.651	0.713676	79.3497	-1.58762
55-59 years	83.4134	79.9131	-3.50027	82.3948	-1.01862	83.7311	0.317741	85.2011	1.78768
60-64 years	84.4091	80.432	-3.97706	81.7371	-2.672	84.0957	-0.313339	84.5435	0.134392
65-69 years	84.7044	80.8467	-3.85773	82.3818	-2.32256	83.886	-0.818398	82.5731	-2.13129
Ethnicity
Danish descent	84.2903	81.0084	-3.28189	82.8663	-1.42403	84.5614	0.271095	84.0641	-0.226181
Descendant of immigrant	76.4121	82.6923	6.2802	80.7692	4.35712	74.8603	-1.55177
Western immigrant	70.6915	65.643	-5.04848	68.8596	-1.83183	69.1396	-1.55186	67.2566	-3.43484
Non-western immigrant	69.854	64.1915	-5.66248	67.1819	-2.67206	69.5628	-0.291191	69.1983	-0.65567
Cohabitation status
Living alone	75.1752	71.275	-3.9002	73.4458	-1.72935	74.8306	-0.344551	73.7511	-1.42412
Cohabiting	81.7514	77.9721	-3.77931	80.3228	-1.42861	81.8393	0.0878372	83.4722	1.72078
Married	87.4054	84.3447	-3.06068	86.0094	-1.39601	87.6573	0.251953	87.0885	-0.316879
Educational level (ISCED)
ISCED15 level 1-2	82.6747	79.1973	-3.47742	80.847	-1.82766	82.9345	0.259819	82.8339	0.159203
ISCED15 level 3-4	84.6217	80.9168	-3.70486	82.8125	-1.80919	84.4662	-0.155495	83.4137	-1.20799
ISCED15 level 5-8	83.6139	80.2556	-3.35832	83.6902	0.0762787	83.5333	-0.0806122	83.3696	-0.244331
Disposable income
Lowest quintile	76.144	69.2674	-6.87666	71.5367	-4.60731	73.5337	-2.61031	70.2226	-5.92146
Second quintile	79.3332	73.383	-5.95021	75.6272	-3.70594	76.6916	-2.64157	77.3399	-1.99328
Third quintile	84.7978	80.9537	-3.84403	82.5172	-2.28053	84.8564	0.0585938	84.4031	-0.394676
Fourth quintile	87.7081	85.0688	-2.63936	87.7113	0.00314331	88.6367	0.928558	87.9641	0.255951
Highest quintile	87.9888	87.3069	-0.681885	88.6202	0.631462	89.4516	1.46283	90.0112	2.02238
Healthcare usage
Rare	78.2453	74.639	-3.60632	76.6775	-1.56776	78.1648	-0.0804749	77.9236	-0.321724
Low	84.033	80.9927	-3.0403	82.5718	-1.4612	84.2748	0.241829	84.711	0.67807
Average	85.0025	81.2704	-3.73215	83.5682	-1.43431	85.2217	0.219208	83.8671	-1.13539
High	85.2993	81.898	-3.40136	82.3617	-2.93767	85.4343	0.134979	84.7569	-0.54245
Frequent	83.8535	79.8164	-4.03709	82.6009	-1.25261	83.3975	-0.455956	82.9728	-0.880692
* The difference in participation between each pandemic phase compared to the pre-pandemic phase
