# Supplementary material for: Nationwide mammography screening participation in Denmark during the COVID-19 pandemic: An observational study
Source: eLife. 2023 Aug 17;12:e83541. doi: 10.7554/eLife.83541 (PMC10513477; doi:10.7554/eLife.83541)
Supplement: Supplementary file 4. [file elife-83541-supp4.xlsx]

## Sheet: Sheet1
Supplementary File 4. Prevalence ratios and 95% confidence intervals of participation in mammography screening in Denmark within 90 days since invitation from 2016 to 2021*
		Pre-pandemic (01Jan2016-31Jan2020)		Pre-lockdown (01Feb2020-10Mar2020)		1st lockdown (11Mar2020-15Apr2020)		1st re-opening (16Apr2020-15Dec2020)		2nd lockdown (16Dec2020-27Feb2021)		2nd re-opening (28Feb2021-30Sep2021)
		N=1346959	N=1828791	N=35175		N=14134		N=201613		N=61991		N=168919	N=1828791
	N	PR	[95%CI]	PR	[95%CI]	PR	[95%CI]	PR	[95%CI]	PR	[95%CI]	PR	[95%CI]
Overall	1828791	1	-	0.847117	[0.84; 0.85]	0.933718	[0.92; 0.94]	0.986796	[0.98; 0.99]	0.994514	[0.99; 1.00]	0.980575	[0.98; 0.98]
Age at invitation
50-54 years	571257	1	-	0.84736	[0.84; 0.86]	0.94422	[0.93; 0.96]	0.991291	[0.99; 1.00]	0.993884	[0.99; 1.00]	0.978189	[0.97; 0.99]
55-59 years	447794	1	-	0.856488	[0.84; 0.87]	0.939793	[0.92; 0.96]	0.985819	[0.98; 0.99]	0.998438	[0.99; 1.01]	0.973522	[0.97; 0.98]
60-64 years	413752	1	-	0.851949	[0.84; 0.87]	0.933718	[0.92; 0.95]	0.991063	[0.98; 1.00]	1.0018	[0.99; 1.01]	0.991333	[0.98; 1.00]
65-69 years	395988	1	-	0.829069	[0.82; 0.84]	0.914568	[0.90; 0.93]	0.977378	[0.97; 0.98]	0.98605	[0.98; 1.00]	0.98219	[0.98; 0.99]
Ethnicity
Danish descent	165070	1	-	0.854748	[0.85; 0.86]	0.938393	[0.93; 0.95]	0.989521	[0.99; 0.99]	0.998085	[0.99; 1.00]	0.982986	[0.98; 0.99]
Descendant of immigrant	2956	1	-	0.824237	[0.67; 1.02]	0.878653	[0.65; 1.19]	0.93487	[0.85; 1.02]	1.09645	[0.97; 1.24]	0.961855	[0.86; 1.08]
Western immigrant	48310	1	-	0.784753	[0.74; 0.83]	0.915636	[0.85; 0.99]	0.965079	[0.94; 0.99]	0.971831	[0.93; 1.01]	0.977906	[0.95; 1.01]
Non-western immigrant	97434	1	-	0.748763	[0.72; 0.78]	0.900881	[0.85; 0.95]	0.965447	[0.95; 0.98]	0.995761	[0.97; 1.02]	0.955534	[0.93; 0.98]
Cohabitation status
Living alone	491009	1	-	0.822425	[0.81; 0.84]	0.910108	[0.89; 0.93]	0.969474	[0.96; 0.98]	0.940549	[0.91; 0.97]	N/A	N/A
Cohabiting	148087	1	-	0.845402	[0.82; 0.87]	0.93509	[0.91; 0.97]	0.985358	[0.98; 1.00]	0.992924	[0.95; 1.03]	N/A	N/A
Married	966288	1	-	0.861099	[0.85; 0.87]	0.946145	[0.94; 0.96]	0.992606	[0.99; 1.00]	0.97543	[0.96; 0.99]	N/A	N/A
Educational level (ISCED)
ISCED15 level 1-2	105829	1	-	0.848739	[0.84; 0.86]	0.931366	[0.92; 0.94]	0.985668	[0.98; 0.99]	0.996118	[0.99; 1.00]	0.979823	[0.98; 0.98]
ISCED15 level 3-4	527145	1	-	0.852831	[0.84; 0.86]	0.938035	[0.92; 0.95]	0.990938	[0.99; 1.00]	0.995799	[0.99; 1.00]	0.983409	[0.98; 0.99]
ISCED15 level 5-8	216999	1	-	0.82753	[0.81; 0.85]	0.936667	[0.91; 0.96]	0.987295	[0.98; 1.00]	0.99054	[0.98; 1.00]	0.98871	[0.98; 1.00]
Disposable income
Lowest quintile	352974	1	-	0.803635	[0.79; 0.82]	0.899962	[0.88; 0.93]	0.976015	[0.97; 0.98]	0.976168	[0.96; 0.99]	0.976655	[0.97; 0.99]
Second quintile	359227	1	-	0.825376	[0.81; 0.84]	0.909924	[0.89; 0.93]	0.96347	[0.96; 0.97]	0.961145	[0.95; 0.97]	0.961256	[0.95; 0.97]
Third quintile	365341	1	-	0.857019	[0.84; 0.87]	0.926804	[0.91; 0.95]	0.991027	[0.98; 1.00]	0.992825	[0.98; 1.00]	0.973404	[0.97; 0.98]
Fourth quintile	371458	1	-	0.869492	[0.86; 0.88]	0.963637	[0.95; 0.98]	0.997462	[0.99; 1.00]	1.0011	[0.99; 1.01]	0.984847	[0.98; 0.99]
Highest quintile	378694	1	-	0.86959	[0.86; 0.88]	0.960635	[0.94; 0.98]	0.996022	[0.99; 1.00]	1.00561	[1.00; 1.01]	0.984959	[0.98; 0.99]
Healthcare usage
Rare	408348	1	-	0.848152	[0.83; 0.86]	0.934862	[0.91; 0.96]	0.983973	[0.98; 0.99]	0.992203	[0.98; 1.00]	0.972232	[0.96; 0.98]
Low	324544	1	-	0.861507	[0.85; 0.88]	0.942801	[0.92; 0.96]	0.989903	[0.98; 1.00]	0.999317	[0.99; 1.01]	0.974611	[0.97; 0.98]
Average	397698	1	-	0.848091	[0.84; 0.86]	0.939455	[0.92; 0.96]	0.992011	[0.99; 1.00]	0.995645	[0.99; 1.01]	0.98795	[0.98; 1.00]
High	339559	1	-	0.856804	[0.84; 0.87]	0.921497	[0.90; 0.94]	0.990492	[0.98; 1.00]	0.99667	[0.99; 1.01]	0.990629	[0.98; 1.00]
Frequent	358642	1	-	0.826938	[0.81; 0.84]	0.932225	[0.91; 0.95]	0.980381	[0.97; 0.99]	0.992188	[0.98; 1.00]	0.98111	[0.97; 0.99]
* Adjusted for month, year and age at invitation; PR=prevalence ratio; CI=confidence interval; ISCED=International Standard Classification of Education
