# Supplementary material for: Nationwide mammography screening participation in Denmark during the COVID-19 pandemic: An observational study
Source: eLife. 2023 Aug 17;12:e83541. doi: 10.7554/eLife.83541 (PMC10513477; doi:10.7554/eLife.83541)
Supplement: Supplementary file 5. [file elife-83541-supp5.xlsx]

## Sheet: Sheet1
Supplementary File 5. Prevalence ratios and 95% confidence intervals of participation in mammography screening in Denmark within 180 days since invitation from 2016 to 2021*
		Pre-pandemic (01Jan2016-31Jan2020)		Pre-lockdown (01Feb2020-10Mar2020)		1st lockdown (11Mar2020-15Apr2020)		1st re-opening (16Apr2020-15Dec2020)		2nd lockdown (16Dec2020-27Feb2021)		2nd re-opening (28Feb2021-30June2021)
		N=1346959	N=1828791	N=35175		N=14134		N=201613		N=61991		N=168919	N=1828791
	N	PR	[95%CI]	PR	[95%CI]	PR	[95%CI]	PR	[95%CI]	PR	[95%CI]	PR	[95%CI]
Overall	1828791	1	-	0.927094	[0.92; 0.93]	0.961442	[0.95; 0.97]	0.987691	[0.98; 0.99]	1.00167	[1.00; 1.01]	0.99187	[0.99; 1.00]
Age at invitation
50-54 years	571257	1	-	0.927133	[0.92; 0.94]	0.958906	[0.94; 0.98]	0.9883	[0.98; 0.99]	0.9947	[0.99; 1.00]	0.989916	[0.98; 1.00]
55-59 years	447794	1	-	0.929967	[0.92; 0.94]	0.966351	[0.95; 0.98]	0.989039	[0.98; 0.99]	1.00686	[1.00; 1.02]	0.988589	[0.98; 1.00]
60-64 years	413752	1	-	0.929987	[0.92; 0.94]	0.961207	[0.94; 0.98]	0.992264	[0.99; 1.00]	1.00937	[1.00; 1.02]	1.00268	[1.00; 1.01]
65-69 years	395988	1	-	0.919654	[0.91; 0.93]	0.958408	[0.94; 0.97]	0.98129	[0.98; 0.99]	1.00091	[0.99; 1.01]	0.989417	[0.98; 1.00]
Ethnicity
Danish descent	165070	1	-	0.931616	[0.93; 0.94]	0.964424	[0.96; 0.97]	0.990428	[0.99; 0.99]	1.00657	[1.00; 1.01]	0.993741	[0.99; 1.00]
Descendant of immigrant	2956	1	-	0.962788	[0.82; 1.13]	1.09454	[0.89; 1.34]	0.914177	[0.84; 0.99]	1.06838	[0.95; 1.20]	0.986909	[0.88; 1.10]
Western immigrant	48310	1	-	0.886596	[0.84; 0.93]	0.950282	[0.89; 1.02]	0.970608	[0.95; 0.99]	0.993906	[0.96; 1.03]	1.01387	[0.98; 1.05]
Non-western immigrant	97434	1	-	0.874911	[0.84; 0.91]	0.948649	[0.90; 1.00]	0.965189	[0.95; 0.98]	1.00723	[0.98; 1.03]	0.989116	[0.97; 1.01]
Cohabitation status
Living alone	491009	1	-	0.906706	[0.89; 0.92]	0.948688	[0.93; 0.97]	0.974269	[0.97; 0.98]	0.971056	[0.95; 1.00]	N/A	N/A
Cohabiting	148087	1	-	0.908964	[0.89; 0.93]	0.954545	[0.93; 0.98]	0.98415	[0.98; 0.99]	1.015	[0.98; 1.05]	N/A	N/A
Married	966288	1	-	0.939422	[0.93; 0.95]	0.969231	[0.96; 0.98]	0.992341	[0.99; 1.00]	0.997484	[0.99; 1.01]	N/A	N/A
Educational level (ISCED)
ISCED15 level 1-2	105829	1	-	0.928042	[0.92; 0.94]	0.955838	[0.95; 0.97]	0.987265	[0.98; 0.99]	1.00249	[1.00; 1.01]	0.989822	[0.98; 0.99]
ISCED15 level 3-4	527145	1	-	0.9286	[0.92; 0.94]	0.966383	[0.95; 0.98]	0.990619	[0.99; 1.00]	1.00228	[0.99; 1.01]	0.994198	[0.99; 1.00]
ISCED15 level 5-8	216999	1	-	0.919994	[0.90; 0.94]	0.980228	[0.96; 1.00]	0.985805	[0.98; 0.99]	1.00172	[0.99; 1.01]	1.00261	[0.99; 1.01]
Disposable income
Lowest quintile	352974	1	-	0.891106	[0.87; 0.91]	0.936517	[0.91; 0.96]	0.978065	[0.97; 0.99]	0.987674	[0.97; 1.00]	0.98478	[0.97; 1.00]
Second quintile	359227	1	-	0.902085	[0.89; 0.92]	0.942273	[0.92; 0.96]	0.967161	[0.96; 0.97]	0.973437	[0.96; 0.99]	0.971677	[0.96; 0.98]
Third quintile	365341	1	-	0.932597	[0.92; 0.94]	0.956499	[0.94; 0.97]	0.993353	[0.99; 1.00]	0.99688	[0.99; 1.01]	0.981743	[0.97; 0.99]
Fourth quintile	371458	1	-	0.941196	[0.93; 0.95]	0.983107	[0.97; 1.00]	0.997587	[0.99; 1.00]	1.00746	[1.00; 1.02]	0.992909	[0.99; 1.00]
Highest quintile	378694	1	-	0.958337	[0.95; 0.97]	0.982907	[0.97; 1.00]	0.994196	[0.99; 1.00]	1.00992	[1.00; 1.02]	0.997605	[0.99; 1.00]
Healthcare usage
Rare	408348	1	-	0.922709	[0.91; 0.94]	0.955544	[0.94; 0.98]	0.980954	[0.97; 0.99]	0.995151	[0.98; 1.01]	0.981462	[0.97; 0.99]
Low	324544	1	-	0.937789	[0.92; 0.95]	0.966254	[0.95; 0.99]	0.988444	[0.98; 0.99]	1.00536	[1.00; 1.02]	0.98604	[0.98; 0.99]
Average	397698	1	-	0.930478	[0.92; 0.94]	0.96719	[0.95; 0.98]	0.993118	[0.99; 1.00]	1.00307	[0.99; 1.01]	1.00048	[0.99; 1.01]
High	339559	1	-	0.932389	[0.92; 0.94]	0.951585	[0.93; 0.97]	0.993143	[0.99; 1.00]	1.00301	[0.99; 1.01]	1.0017	[0.99; 1.01]
Frequent	358642	1	-	0.918134	[0.91; 0.93]	0.969019	[0.95; 0.99]	0.985685	[0.98; 0.99]	1.0051	[1.00; 1.01]	0.993869	[0.99; 1.00]
* Adjusted for month, year and age at invitation; PR=prevalence ratio; CI=confidence interval; ISCED=International Standard Classification of Education
